# Supplementary material
Source: Springer Nature journal article supplement (https://www.springermedizin.de/resource/supplementary/12880_2011_127_MOESM4_ESM.pdf/9450052)

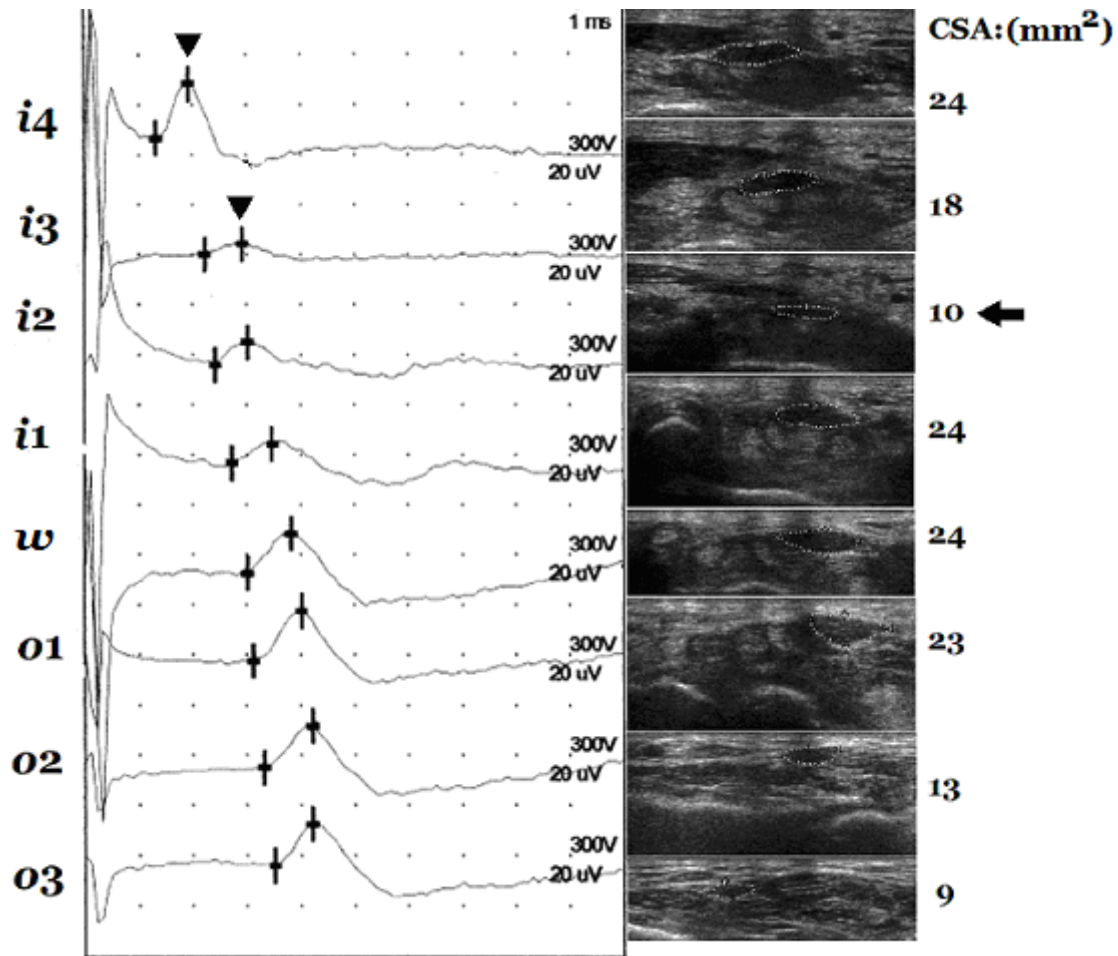

Supplement: MOESM4 [file 9450052]
